# Supplementary material for: Testing Theory-Enhanced Messaging to Promote COVID-19 Vaccination: Results from a Randomized Controlled Trial
Source: Research Square preprint supplement (doi:10.21203/rs.3.rs-6472442/v1), 2025-05-02
Supplement: Supplementary file 1 [file 0ae9ec1879eab42d4bf1f838.xlsx]

## Sheet: Table 1
		Table 1: Primary Outcome - Vaccine Uptake at 4 week Follow-Up by Intervention Arm and Presence of Mental Health Symptoms
			Exposure	N at risk	Loss to follow up	Number of actual event without imputation	Number of weighted event after imputation	95% CI	4-week uptake	95% CI	Pooled Risk difference	95% CI	Pooled Risk ratio	95% CI
		Total			56	17
	Receive vaccine	Overall	CBT	469	19	7	7.433	1.907, 12.959	0.0158486	0.004, 0.028	0.003	-0.013, 0.018	1.207	0.406, 3.590
			Inoculation	466	20	4	4.2	0.107, 8.293	0.00901288	0.000, 0.018	-0.004	-0.018, 0.010	0.687	0.194, 2.436
			Standard	468	17	6	6.133	1.239, 11.027	0.0131047	0.003, 0.024	ref	ref	ref	ref
		Mental health symptoms: Yes	CBT	178	7	5	5.233	0.626, 9.841	0.0293989	0.004, 0.055	0.018	-0.012, 0.048	2.583	0.499, 13.377
			Inoculation	176	9	1	1.133	-1.064, 3.331	0.0064375	-0.006, 0.019	-0.005	-0.025, 0.015	0.55	0.050, 6.048
			Standard	179	5	2	2.033	-0.782, 4.849	0.0113575	-0.004, 0.027	ref	ref	ref	ref
		Mental health symptoms: No	CBT	291	12	2	2.2	-0.817, 5.217	0.00756014	-0.003, 0.018	-0.007	-0.024, 0.011	0.527	0.097, 2.850
			Inoculation	290	11	3	3.067	-0.399, 6.532	0.0105759	-0.001, 0.023	-0.004	-0.022, 0.015	0.745	0.167, 3.332
			Standard	289	12	4	4.1	0.092, 8.108	0.0141869	0.000, 0.028	ref	ref	ref	ref

## Sheet: Table 2
		Table 2: Secondary Outcome - Vaccine Willingness at 4 week Follow-Up by Intervention Arm and Presence of Mental Health Symptoms
			Exposure	N at risk	Loss to follow up	Number of actual event without imputation	Number of weighted event after imputation	95% CI	4-week uptake	95% CI	Pooled Risk difference	95% CI	Pooled Risk ratio	95% CI
		Total			56	17
	Vaccine willingness	Overall	CBT	469	20	138	144	121.4, 166.5	0.307036	0.259, 0.355	-0.003	-0.063, 0.058	0.992	0.785, 1.253
			Inoculation	466	21	168	177	152.0, 201.9	0.379828	0.326, 0.433	0.07	0.008, 0.133	1.227	0.981, 1.534
			Standard	468	18	139	144.933	122.2, 167.6	0.309686	0.261, 0.358	ref	ref	ref	ref
		Mental health symptoms: Yes	CBT	178	7	58	59.7	45.4, 74.1	0.335393	0.255, 0.416	0.007	-0.092, 0.106	1.021	0.710, 1.467
			Inoculation	176	9	67	71	55.3, 86.6	0.403409	0.314, 0.492	0.074	-0.028, 0.177	1.226	0.863, 1.741
			Standard	179	5	57	58.9	44.5, 73.2	0.32905	0.249, 0.409	ref	ref	ref	ref
		Mental health symptoms: No	CBT	291	13	80	84.2	66.9, 101.6	0.289347	0.230, 0.349	-0.008	-0.084, 0.068	0.972	0.716, 1.319
			Inoculation	290	12	101	106	86.7, 125.3	0.365517	0.299, 0.432	0.068	-0.011, 0.146	1.227	0.919, 1.639
			Standard	289	13	82	86.1	68.5, 103.7	0.297924	0.237, 0.359	ref	ref	ref	ref

## Sheet: Table 3
			Table 3 - Measures of Likelihood to Make Time and Make an Appointment for a Vaccine
					Overall	CBT	Inoculation	Standard	p value	smd
					N = 1,403	(N=469)	(N=466)	(N=468)
		Vaccine willingness (Pre-intervention)								c(0.159, 0.077)
		Don't know/Not sure			102(7.3%)	32(6.8%)	38(8.2%)	32(6.8%)
		Not willing			319(23%)	108(23%)	88(19%)	123(26%)
		Somewhat willing			537(38%)	188(40%)	171(37%)	178(38%)
		Very willing			445(32%)	141(30%)	169(36%)	135(29%)
		Make time for vaccine (Post-intervention)							0.86
		Don't know/Not sure			167(12%)	61(13%)	53(11%)	53(11%)
		Not likely			805(57%)	274(58%)	258(55%)	273(58%)
		Somewhat likely			291(21%)	87(19%)	107(23%)	97(21%)
		Very likely			136(9.7%)	46(9.8%)	46(9.9%)	44(9.4%)
		Missing data			4(0.3%)	1(0.2%)	2(0.4%)	1(0.2%)
		Make time for vaccine (4-week follow-up)
		Don't know/Not sure			128(9.1%)	44(9.4%)	47(10%)	37(7.9%)	0.37
		Not likely			847(60%)	295(63%)	261(56%)	291(62%)
		Received vaccine			17(1.2%)	7(1.5%)	4(0.9%)	6(1.3%)
		Somewhat likely			304(22%)	91(19%)	110(24%)	103(22%)
		Very likely			106(7.6%)	32(6.8%)	43(9.2%)	31(6.6%)
		Missing data			1(<0.1%)	0(0%)	1(0.2%)	0(0%)
		Make appointment for vaccine (Post-intervention)							0.85
		Already made an appointment			24(1.7%)	9(1.9%)	8(1.7%)	7(1.5%)
		Don't know/Not sure			417(30%)	146(31%)	139(30%)	132(28%)
		Not planning			737(53%)	244(52%)	236(51%)	257(55%)
		Planning			223(16%)	69(15%)	82(18%)	72(15%)
		Missing data			2(0.1%)	1(0.2%)	1(0.2%)	0(0%)
		Make appointment for vaccine (4-week follow-up)							0.4
		Already made an appointment			18(1.3%)	9(1.9%)	6(1.3%)	3(0.6%)
		Don't know/Not sure			329(23%)	116(25%)	114(24%)	99(21%)
		Not planning			814(58%)	272(58%)	259(56%)	283(60%)
		Planning			224(16%)	65(14%)	82(18%)	77(16%)
		Received vaccine			17(1.2%)	7(1.5%)	4(0.9%)	6(1.3%)
		Missing data			1(<0.1%)	0(0%)	1(0.2%)	0(0%)
		Number of vaccine barriers							0.4
		No vaccine barrier			1,214(87%)	411(88%)	393(84%)	410(88%)
		One vaccine barrier			164(12%)	49(10%)	66(14%)	49(10%)
		Three vaccine barriers			1(<0.1%)	0(0%)	0(0%)	1(0.2%)
		Two vaccine barriers			24(1.7%)	9(1.9%)	7(1.5%)	8(1.7%)

## Sheet: Table 4 -AppendixA
				Table 4 - Participant Characteristics by Arm
				Overall	CBT	Inoculation	Standard	SMD
				N = 1,403	(N=469)	(N=466)	(N=468)
		Age category						0.064, 0.123
		18-29		226(16%)	68 (14.5%)	77 (16.5%)	81 (17.3%)
		30-39		437(31%)	153 (32.6%)	150 (32.2%)	134 (28.6%)
		40-49		293(21%)	96 (20.5%)	88 (18.9%)	109 (23.3%)
		50-64		290(21%)	99 (21.1%)	100 (21.5%)	91 (19.4%)
		>=65		157(11%)	53 (11.3%)	51 (10.9%)	53 (11.3%)
		Gender						0.168, 0.123
		Male		574(41%)	192 (40.9%)	183 (39.3%)	199 (42.5%)
		Female		787(56%)	270 (57.6%)	263 (56.4%)	254 (54.3%)
		Non-binary		42(3.0%)	7 (1.5%)	20 (4.3%)	15 (3.2%)
		Race/Ethnicity						0.128, 0.071
		Hispanic		246(18%)	84 (17.9%)	78 (16.7%)	84 (17.9%)
		White NH		842(60%)	288 (61.4%)	268 (57.5%)	286 (61.1%)
		Black NH		151(11%)	49 (10.4%)	60 (12.9%)	42 (9.0%)
		Asian/American Indian/Pacific		120(8.6%)	34 (7.2%)	46 (9.9%)	40 (8.5%)
		other/unknown		44(3.1%)	14 (3.0%)	14 (3.0%)	16 (3.4%)
		Education						0.069, 0.075
		Less than 12th grade		23(1.6%)	8 (1.7%)	10 (2.1%)	5 (1.1%)
		12th grade/GED		137(9.8%)	42 (9.0%)	48 (10.3%)	47 (10.0%)
		Some college (1-3 years)		432(31%)	151 (32.2%)	139 (29.8%)	142 (30.3%)
		College (4 or more years)		811(58%)	268 (57.1%)	269 (57.7%)	274 (58.5%)
		Employment Status						0.151, 0.142
		Employed		1,011(72%)	350 (74.6%)	318 (68.2%)	343 (73.3%)
		Out of Work		103(7.3%)	26 (5.5%)	35 (7.5%)	42 (9.0%)
		Retired		150(11%)	49 (10.4%)	54 (11.6%)	47 (10.0%)
		home maker/students/other		139(9.9%)	44 (9.4%)	59 (12.7%)	36 (7.7%)
		Household annual income						0.164, 0.123
		Less than $35,000		405(29%)	124 (26.4%)	147 (31.5%)	134 (28.6%)
		$35,000 - $49,999		188(13%)	64 (13.6%)	53 (11.4%)	71 (15.2%)
		$50,000 - $69,999		213(15%)	72 (15.4%)	72 (15.5%)	69 (14.7%)
		$70,000 - $99,999		242(17%)	93 (19.8%)	74 (15.9%)	75 (16.0%)
		$100,000+		302(22%)	102 (21.7%)	100 (21.5%)	100 (21.4%)
		Don't know		53(3.8%)	14 (3.0%)	20 (4.3%)	19 (4.1%)
		Region						0.081, 0.129
		MidWest		232(17%)	76 (16.2%)	72 (15.5%)	84 (17.9%)
		NorthEast		374(27%)	127 (27.1%)	113 (24.2%)	134 (28.6%)
		South		465(33%)	163 (34.8%)	167 (35.8%)	135 (28.8%)
		Other		3(0.2%)	1 (0.2%)	1 (0.2%)	1 (0.2%)
		West		329(23%)	102 (21.7%)	113 (24.2%)	114 (24.4%)
		Children in household						0.046, 0.106
		No		981(70%)	317 (67.6%)	325 (69.7%)	339 (72.4%)
		Yes		422(30%)	152 (32.4%)	141 (30.3%)	129 (27.6%)
		Zip-code level political Affiliation: Republican						0.042, 0.009
		No		1,078(77%)	357 (76.1%)	363 (77.9%)	358 (76.5%)
		Yes		322(23%)	111 (23.7%)	102 (21.9%)	109 (23.3%)
		unknown		3(0.2%)	1 (0.2%)	1 (0.2%)	1 (0.2%)
		Insurance status at trial baseline						0.115, 0.128
		Employer-based		783(56%)	279 (59.5%)	254 (54.5%)	250 (53.4%)
		Medicaid		190(14%)	57 (12.2%)	62 (13.3%)	71 (15.2%)
		No insurance		93(6.6%)	31 (6.6%)	29 (6.2%)	33 (7.1%)
		others		337(24%)	102 (21.7%)	121 (26.0%)	114 (24.4%)
		Comorbidity
		Number of comorbidity						0.059, 0.081
		0		924(66%)	300 (64.0%)	310 (66.5%)	314 (67.1%)
		1		317(23%)	115 (24.5%)	103 (22.1%)	99 (21.2%)
		2+		162(12%)	54 (11.5%)	53 (11.4%)	55 (11.8%)
		Anxiety or Depression status pre-trial (mhc)						0.004, 0.006
		No		870(62%)	291 (62.0%)	290 (62.2%)	289 (61.8%)
		Yes		533(38%)	178 (38.0%)	176 (37.8%)	179 (38.2%)
		Asthma						0.01, 0.019
		No		1,201(86%)	402 (85.7%)	401 (86.1%)	398 (85.0%)
		Yes		202(14%)	67 (14.3%)	65 (13.9%)	70 (15.0%)
		Cancer						0.011, 0.028
		No		1,324(94%)	444 (94.7%)	440 (94.4%)	440 (94.0%)
		Yes		79(5.6%)	25 (5.3%)	26 (5.6%)	28 (6.0%)
		Kidney						0.022, 0.011
		No		1,352(96%)	451 (96.2%)	450 (96.6%)	451 (96.4%)
		Yes		51(3.6%)	18 (3.8%)	16 (3.4%)	17 (3.6%)
		Lung						0.066, 0.023
		No		1,347(96%)	453 (96.6%)	444 (95.3%)	450 (96.2%)
		Yes		56(4.0%)	16 (3.4%)	22 (4.7%)	18 (3.8%)
		Liver						0.018, 0.018
		No		1,384(99%)	462 (98.5%)	460 (98.7%)	462 (98.7%)
		Yes		19(1.4%)	7 (1.5%)	6 (1.3%)	6 (1.3%)
		Diabetes						0.063, 0.04
		No		1,289(92%)	432 (92.1%)	421 (90.3%)	436 (93.2%)
		Yes		114(8.1%)	37 (7.9%)	45 (9.7%)	32 (6.8%)
		Heart diseases						0.083, 0.061
		No		1,345(96%)	445 (94.9%)	450 (96.6%)	450 (96.2%)
		Yes		58(4.1%)	24 (5.1%)	16 (3.4%)	18 (3.8%)
		HIV						0.013, 0.033
		No		1,348(96%)	452 (96.4%)	448 (96.1%)	448 (95.7%)
		Yes		55(3.9%)	17 (3.6%)	18 (3.9%)	20 (4.3%)
		Immunosuppression						0.095, 0.011
		No		1,329(95%)	448 (95.5%)	435 (93.3%)	446 (95.3%)
		Yes		74(5.3%)	21 (4.5%)	31 (6.7%)	22 (4.7%)
		Number of COVID-19 vaccine as of Dec 2023						0.001, 0.051
		Median (IQR)		3.00 (2.00, 4.00)	3.00 (2.00, 4.00)	3.00 (2.00, 4.00)	3.00 (2.00, 4.00)
		Timing of most recent COVID-19 vaccination						0.083, 0.071
		2020		26(1.9%)	8 (1.7%)	9 (1.9%)	9 (1.9%)
		2021		777(55%)	262 (55.9%)	242 (51.9%)	273 (58.3%)
		2022		541(39%)	179 (38.2%)	191 (41.0%)	171 (36.5%)
		2023		59(4.2%)	20 (4.3%)	24 (5.2%)	15 (3.2%)
		Number of COVID-19 infection as of Dec 2023						0.058, 0.134
		Median (IQR)		2.00 (1.00, 3.00)	2.00 (2.00, 3.00)	2.00 (1.00, 3.00)	2.00 (1.00, 3.00)
		Timing of most recent COVID-19 infection						0.139, 0.122
		2020		38(2.7%)	12 (2.6%)	16 (3.4%)	10 (2.1%)
		2021		206(14.7%)	69 (14.7%)	56 (12.0%)	81 (17.3%)
		2022		426(30.4%)	142 (30.3%)	157 (33.7%)	127 (27.1%)
		2023		348(24.8%)	126 (26.9%)	113 (24.2%)	109 (23.3%)
		Never infected		385(27.4%)	120 (25.6%)	124 (26.6%)	141 (30.1%)
		Has a personal doctor/provider						0.172, 0.102
		No		327(23%)	98 (20.9%)	113 (24.2%)	116 (24.8%)
		Yes		1,043(74%)	355 (75.7%)	348 (74.7%)	340 (72.6%)
		Don't know/not sure		33(2.4%)	16 (3.4%)	5 (1.1%)	12 (2.6%)
		Can't see a doctor due to cost in the past 12 months						0.109, 0.086
		No		1,201(86%)	410 (87.4%)	394 (84.5%)	397 (84.8%)
		Yes		186(13%)	55 (11.7%)	63 (13.5%)	68 (14.5%)
		Don't know/not sure		16(1.1%)	4 (0.9%)	9 (1.9%)	3 (0.6%)
		Discrimination during healthcare visits						0.176, 0.241
		No		1,158(83%)	409 (87.2%)	377 (80.9%)	372 (79.5%)
		Yes		116(8.3%)	32 (6.8%)	47 (10.1%)	37 (7.9%)
		Don't know/not sure		45(3.2%)	11 (2.3%)	14 (3.0%)	20 (4.3%)
		No visits in the past two years		84(6.0%)	17 (3.6%)	28 (6.0%)	39 (8.3%)
		Worried about getting sick from COVID						0.118, 0.167
		Not at all worried		255(18%)	77 (16.4%)	82 (17.6%)	96 (20.5%)
		Not too worried		686(49%)	246 (52.5%)	232 (49.8%)	208 (44.4%)
		Somewhat worried		392(28%)	128 (27.3%)	123 (26.4%)	141 (30.1%)
		Very worried		70(5.0%)	18 (3.8%)	29 (6.2%)	23 (4.9%)
		Worried about loved ones getting sick from COVID						0.14, 0.157
		Not at all worried		166(12%)	51 (10.9%)	51 (10.9%)	64 (13.7%)
		Not too worried		538(38%)	195 (41.6%)	175 (37.6%)	168 (35.9%)
		Somewhat worried		539(38%)	181 (38.6%)	179 (38.4%)	179 (38.2%)
		Very worried		160(11%)	42 (9.0%)	61 (13.1%)	57 (12.2%)
		Vaccine hesitancy before watch video (How willing are you to receive another COVID-19 vaccine dose)						0.159, 0.077
		Very willing		445(32%)	141 (30.1%)	169 (36.3%)	135 (28.8%)
		Somewhat willing		537(38%)	188 (40.1%)	171 (36.7%)	178 (38.0%)
		Not willing		319(23%)	108 (23.0%)	88 (18.9%)	123 (26.3%)
		Don't know		102(7.3%)	32 (6.8%)	38 (8.2%)	32 (6.8%)
		Long COVID status						0.065, 0.07
		No		799(57%)	274 (58.4%)	266 (57.1%)	259 (55.3%)
		Yes		117(8.3%)	36 (7.7%)	42 (9.0%)	39 (8.3%)
		Never infected		409(29%)	136 (29.0%)	131 (28.1%)	142 (30.3%)
		Don't know		78(5.6%)	23 (4.9%)	27 (5.8%)	28 (6.0%)
		Anyone close to you gotten a COVID-19 vaccine within 6 months						0.105, 0.035
		No		727(52%)	246 (52.5%)	240 (51.5%)	241 (51.5%)
		Yes		373(27%)	127 (27.1%)	112 (24.0%)	134 (28.6%)
		Don't know/not sure		303(22%)	96 (20.5%)	114 (24.5%)	93 (19.9%)
		Had a flu vaccine since August 2023						0.075, 0.109
		No		809(58%)	263 (56.1%)	260 (55.8%)	286 (61.1%)
		Yes		584(42%)	204 (43.5%)	201 (43.1%)	179 (38.2%)
		Don't know/not sure		10(0.7%)	2 (0.4%)	5 (1.1%)	3 (0.6%)

## Sheet: Supplemental Table1
			Supplemental Table 1: Sensitivity Analysis Complete
		Exposure	N at risk	Loss to follow up	Complete cases	Number of event among complete cases	4-week uptake	95% CI	Risk difference	95% CI	Risk ratio	95% CI
Receive vaccine	Overall	ARM1	469	19	450	7	0.0155556	0.004, 0.027	0.002	-0.013, 0.018	1.172	0.394, 3.487
		ARM2	466	20	446	4	0.00896861	0.000, 0.018	-0.004	-0.018, 0.009	0.677	0.191, 2.399
		ARM3	468	17	451	6	0.0133038	0.003, 0.024	ref	ref	ref	ref
	Mental health symptoms: Yes	ARM1	178	7	171	5	0.0292398	0.004, 0.055	0.018	-0.012, 0.048	2.544	0.494, 13.112
		ARM2	176	9	167	1	0.00598802	-0.006, 0.018	-0.006	-0.025, 0.014	0.521	0.047, 5.745
		ARM3	179	5	174	2	0.0114943	-0.005, 0.027	ref	ref	ref	ref
	Mental health symptoms: No	ARM1	291	12	279	2	0.00716846	-0.003, 0.017	-0.007	-0.024, 0.010	0.496	0.091, 2.710
		ARM2	290	11	279	3	0.0107527	-0.001, 0.023	-0.004	-0.022, 0.015	0.745	0.167, 3.327
		ARM3	289	12	277	4	0.0144404	0.000, 0.029	ref	ref	ref	ref
Vaccine willingness	Overall	ARM1	469	20	449	138	0.30735	0.265, 0.350	-0.002	-0.062, 0.059	0.996	0.787, 1.260
		ARM2	466	21	445	168	0.377528	0.332, 0.423	0.069	0.007, 0.131	1.224	0.978, 1.532
		ARM3	468	18	450	139	0.308889	0.266, 0.352	ref	ref	ref	ref
	Mental health symptoms: Yes	ARM1	178	7	171	58	0.339181	0.268, 0.411	0.012	-0.088, 0.111	1.035	0.718, 1.492
		ARM2	176	9	167	67	0.401198	0.326, 0.476	0.074	-0.029, 0.176	1.225	0.860, 1.744
		ARM3	179	5	174	57	0.327586	0.257, 0.398	ref	ref	ref	ref
	Mental health symptoms: No	ARM1	291	13	278	80	0.28777	0.234, 0.341	-0.009	-0.085, 0.067	0.969	0.712, 1.318
		ARM2	290	12	278	101	0.363309	0.306, 0.420	0.066	-0.012, 0.144	1.223	0.914, 1.636
		ARM3	289	13	276	82	0.297101	0.243, 0.351	ref	ref	ref	ref

## Sheet: Supplemental Table2
			Supplemental Table 2: Sensitivity Analysis Inverse Probability of Censor Weighted adjusted Model
		Exposure	N at risk	Loss to follow up	Complete cases	Number of event among complete cases	4-week uptake (weighed)	95% CI	Weighted Risk difference	95% CI	Weighted Risk ratio	95% CI
Receive vaccine	Overall	ARM1	469	19	450	7	0.015	0.004, 0.027	0.002	-0.013, 0.018	1.181	0.393, 3.550
		ARM2	466	20	446	4	0.009	0.000, 0.018	-0.004	-0.018, 0.010	0.699	0.197, 2.477
		ARM3	468	17	451	6	0.013	0.003, 0.024	ref	ref	ref	ref
	Mental health symptoms: Yes	ARM1	178	7	171	5	0.029	0.004, 0.054	0.018	-0.012, 0.047	2.59	0.492, 13.629
		ARM2	176	9	167	1	0.006	-0.006, 0.018	-0.005	-0.025, 0.015	0.555	0.051, 6.026
		ARM3	179	5	174	2	0.011	-0.005, 0.027	ref	ref	ref	ref
	Mental health symptoms: No	ARM1	291	12	279	2	0.007	-0.003, 0.017	-0.007	-0.024, 0.010	0.495	0.089, 2.756
		ARM2	290	11	279	3	0.011	-0.001, 0.023	-0.003	-0.022, 0.015	0.764	0.170, 3.423
		ARM3	289	12	277	4	0.014	0.000, 0.028	ref	ref	ref	ref
Vaccine willingness	Overall	ARM1	469	20	449	138	0.308	0.265, 0.350	-0.001	-0.061, 0.059	0.997	0.788, 1.262
		ARM2	466	21	445	168	0.379	0.334, 0.425	0.07	0.009, 0.133	1.229	0.982, 1.539
		ARM3	468	18	450	139	0.309	0.266, 0.351	ref	ref	ref	ref
	Mental health symptoms: Yes	ARM1	178	7	171	58	0.342	0.270, 0.414	0.015	-0.085, 0.115	1.045	0.726, 1.507
		ARM2	176	9	167	67	0.404	0.329, 0.479	0.077	-0.026, 0.179	1.234	0.866, 1.757
		ARM3	179	5	174	57	0.327	0.257, 0.398	ref	ref	ref	ref
	Mental health symptoms: No	ARM1	291	13	278	80	0.286	0.233, 0.340	-0.01	-0.086, 0.065	0.965	0.709, 1.313
		ARM2	290	12	278	101	0.365	0.308, 0.422	0.068	-0.010, 0.146	1.229	0.918, 1.643
		ARM3	289	13	276	82	0.297	0.243, 0.351	ref	ref	ref	ref

## Sheet: Supplemental Table3
			Supplemental Table 3: Sensitivity Analysis Watch
		Exposure	N at risk	Watched	LTFU among watched	Number of event among watched	Weighted 4-week uptake	95% CI	Weighted Risk difference	95% CI	Weighted Risk ratio	95% CI
Receive vaccine	Overall	ARM1	469	426	17	7	0.017	0.004, 0.029	0.006	-0.011, 0.022	1.495	0.463, 4.821
		ARM2	466	430	17	4	0.01	0.000, 0.019	-0.002	-0.016, 0.012	0.853	0.224, 3.256
		ARM3	468	432	16	5	0.011	0.001, 0.022	ref	ref	ref	ref
	Mental health symptoms: Yes	ARM1	178	163	6	5	0.031	0.004, 0.059	0.02	-0.012, 0.052	2.672	0.495, 14.424
		ARM2	176	163	7	1	0.007	-0.006, 0.021	-0.004	-0.026, 0.017	0.619	0.059, 6.457
		ARM3	179	167	5	2	0.012	-0.005, 0.028	ref	ref	ref	ref
	Mental health symptoms: No	ARM1	291	263	11	2	0.008	-0.003, 0.019	-0.003	-0.020, 0.014	0.725	0.120, 4.375
		ARM2	290	267	10	3	0.011	-0.002, 0.024	0	-0.018, 0.018	0.995	0.191, 5.174
		ARM3	289	265	11	3	0.011	-0.002, 0.024	ref	ref	ref	ref
Vaccine willingness	Overall	ARM1	469	426	18	125	0.302	0.257, 0.347	-0.005	-0.068, 0.058	0.983	0.768, 1.259
		ARM2	466	430	18	162	0.39	0.343, 0.437	0.083	0.018, 0.148	1.27	1.006, 1.604
		ARM3	468	432	17	129	0.307	0.263, 0.352	ref	ref	ref	ref
	Mental health symptoms: Yes	ARM1	178	163	6	54	0.344	0.269, 0.419	0.025	-0.078, 0.129	1.079	0.736, 1.583
		ARM2	176	163	7	64	0.407	0.329, 0.485	0.088	-0.018, 0.194	1.276	0.881, 1.849
		ARM3	179	167	5	52	0.319	0.247, 0.392	ref	ref	ref	ref
	Mental health symptoms: No	ARM1	291	263	12	71	0.276	0.220, 0.332	-0.024	-0.103, 0.055	0.921	0.666, 1.273
		ARM2	290	267	11	98	0.38	0.320, 0.440	0.08	-0.002, 0.162	1.268	0.939, 1.712
		ARM3	289	265	12	77	0.3	0.243, 0.357	ref	ref	ref	ref
